# Supplementary material
Source: HighWire-hosted journal article supplement (https://erj.ersjournals.com/content/55/6/1902383)
Supplement: inline-supplementary-material-1 [file inline-supplementary-material-1.pdf]

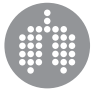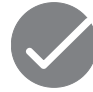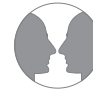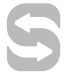

SHAREABLE PDF

# Bedaquiline resistance in drug-resistant tuberculosis HIV co-infected patients

Camus Nimmo <sup>1,2,3</sup>, James Millard<sup>3,4,5</sup>, Kayleen Brien<sup>3</sup>, Sashen Moodley<sup>3</sup>, Lucy van Dorp<sup>2</sup>, Keeren Lutchminarain<sup>6</sup>, Allison Wolf<sup>7</sup>, Alison D. Grant<sup>3,8</sup>, Francois Balloux<sup>2</sup>, Alexander S. Pym<sup>3</sup>, Nesri Padayatchi<sup>9</sup> and Max O'Donnell<sup>9,10</sup>

**Affiliations:** <sup>1</sup>Division of Infection and Immunity, University College London, London, UK. <sup>2</sup>UCL Genetics Institute, University College London, London, UK. <sup>3</sup>Africa Health Research Institute, Durban, South Africa. <sup>4</sup>Wellcome Trust Liverpool Glasgow Centre for Global Health Research, Liverpool, UK. <sup>5</sup>Institute of Infection and Global Health, University of Liverpool, Liverpool, UK. <sup>6</sup>National Health Laboratory Service, Durban, South Africa. <sup>7</sup>Dept of Medicine, Columbia University Medical Center, New York, NY, USA. <sup>8</sup>TB Centre, London School of Hygiene and Tropical Medicine, London, UK. <sup>9</sup>CAPRISA MRC-HIV-TB Pathogenesis and Treatment Research Unit, Durban, South Africa. <sup>10</sup>Dept of Medicine and Epidemiology, Columbia University Medical Center, New York, NY, USA.

**Correspondence:** Max O'Donnell, Dept of Medicine and Epidemiology, Columbia University Medical Center, New York, NY, USA. E-mail: mo2130@cumc.columbia.edu

 @ERSpublications

**Genetic mutations linked to bedaquiline resistance were found before starting treatment and acquired during treatment in patients with drug-resistant TB and HIV in KwaZulu-Natal, South Africa. Routine bedaquiline resistance testing needs to be accelerated.** <http://bit.ly/2vnL4VY>

**Cite this article as:** Nimmo C, Millard J, Brien K, *et al.* Bedaquiline resistance in drug-resistant tuberculosis HIV co-infected patients. *Eur Respir J* 2020; 55: 1902383 [https://doi.org/10.1183/13993003.02383-2019].

This single-page version can be shared freely online.

*To the Editor:*

Global tuberculosis (TB) control is threatened by drug resistance, with over 500 000 cases resistant to first-line drugs in 2018 [1]. Bedaquiline is a highly effective TB drug and has improved drug-resistant TB (DR-TB) outcomes in trial and programmatic settings [2, 3]. The World Health Organization (WHO) recommends its inclusion in most DR-TB regimens [4] and it is under further evaluation in clinical trials. There have been several reports of clinical bedaquiline resistance [5–8]. Resistance-associated variants (RAVs) in clinical isolates identified to date are almost exclusively caused by *Rv0678* mutations which can raise *Mycobacterium tuberculosis* minimum inhibitory concentrations (MICs) for bedaquiline and clofazimine [9].
